# Supplementary material
Source: publisher site journal article supplement (https://www.dovepress.com/article/314472)

|  |  |
| --- | --- |
| **Figure S1** | **Figure S1: Uncropped blots of CD47 (A), CD133 (B) and β-actin (C).** |


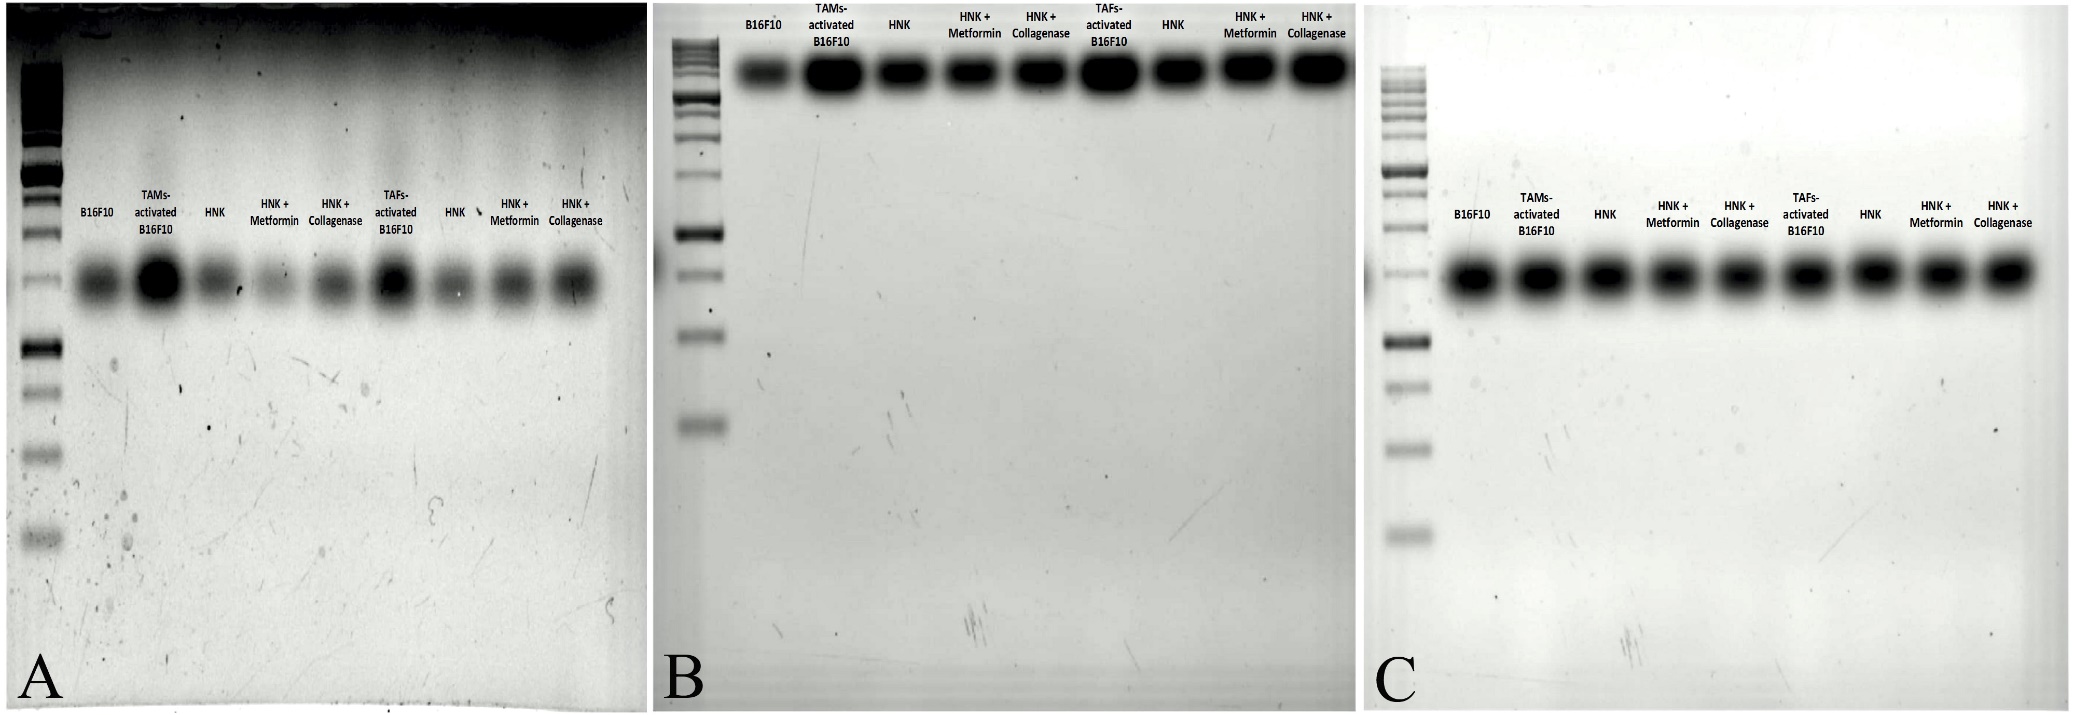

Supplement: Supplementary file 1 [file get_supplementary_file.php]
